# Supplementary material
Source: publisher site journal article supplement (https://www.spandidos-publications.com/3887/downloadSupplementary)
Supplement: Supplementary file 1 [file downloadSupplementary]

Table SI. Primer sequences for the top 10 dysregulated circRNAs (5'-3').

| CircRNA/gene     | Forward primer        | Reverse primer          |
|------------------|-----------------------|-------------------------|
| hsa_circ_0030525 | GCAGCCGCATCTAAGAACTC  | TGAGACACAGGGATGGATGA    |
| hsa_circ_0079954 | GTCCGCATTTGTAGAAAACCA | TAGGAGCTGCCGAGTTTTTG    |
| hsa_circ_0090095 | GGGCAGTGAGCCTGAATTAC  | TCCAGTTTGTGGATGCTCCT    |
| hsa_circ_0060534 | AGCAGGCTTTCAAGAAGTGC  | AAAGGACCTGGACCACACAG    |
| hsa_circ_0032138 | TCTGGGTTGAAACTCAAGCA  | TTGAGCGGCCTAAAAGTTCT    |
| hsa_circ_0066966 | CAGCTCCAGGAGAAGGAAGA  | GGCCTTCGCATGAAGTTTTA    |
| hsa_circ_0085289 | GCTCACTTCGGCTAAAATGC  | TGAGACACAGGGATGGATGA    |
| hsa_circ_0088524 | AGGAAGAATGGAGCCAAAGAG | AGGATGCAACCTTCTCTTGC    |
| hsa_circ_0062852 | AGAAGCTGCAGAAGCTGAGG  | AGATGAACATGCCATCCAGA    |
| hsa_circ_0091095 | CTTGCCTCCAAAACACGAAT  | ACTAACGCCGTGCTGAAATC    |
| GAPDH            | GGAGCGAGATCCCTCCAAAAT | GGCTGTTGTCATACTTCTCATGG |

circRNA, circular RNA.
